# Supplementary material for: Pharmacological inhibition of DNA-PK stimulates Cas9-mediated genome editing
Source: PubMed Central journal article supplement (PMC4550049; doi:10.1186/s13073-015-0215-6), 2015-08-27

**A** 293/TLR

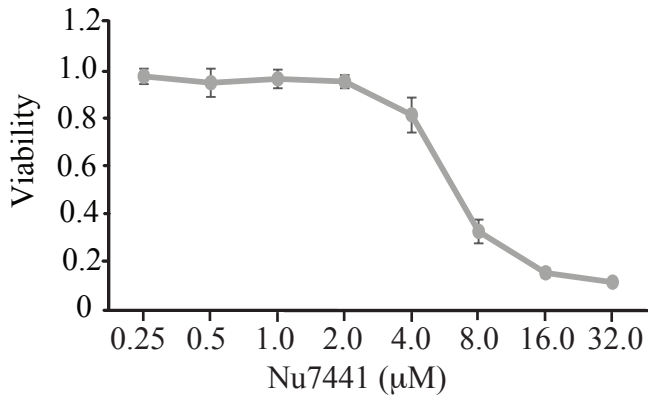

**B** *Arf*<sup>-/-</sup> MEFs

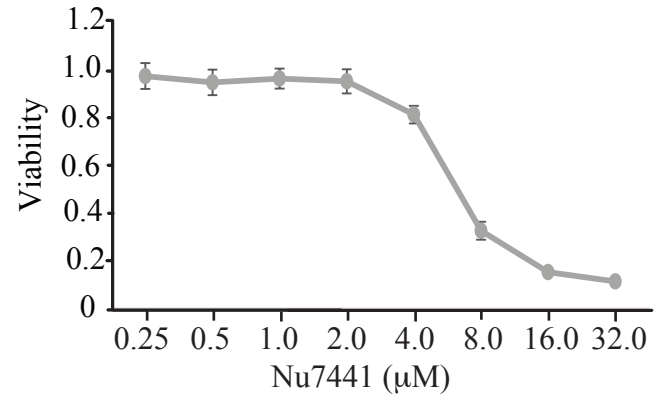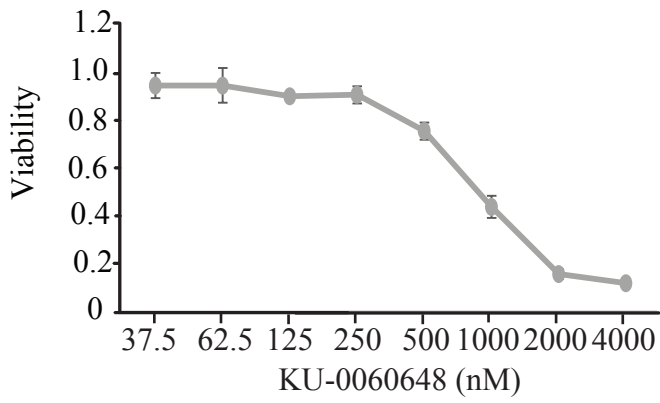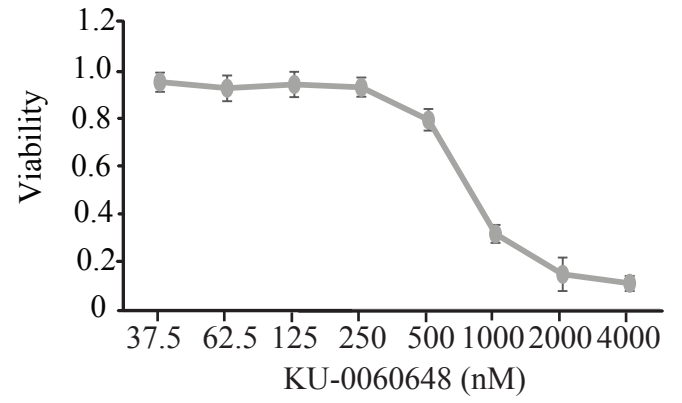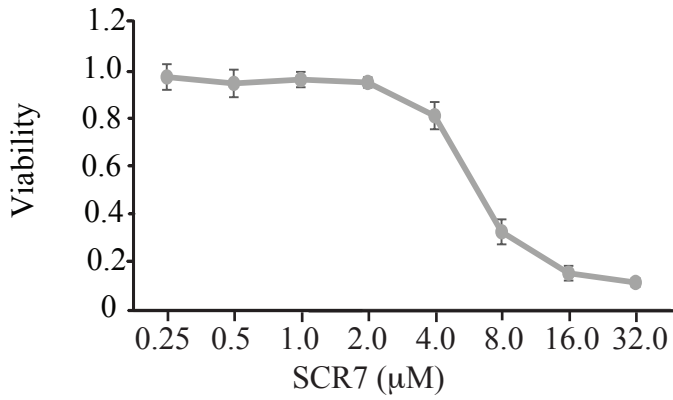

Supplement: 13073_2015_215_MOESM1_ESM.pdf [file 13073_2015_215_MOESM1_ESM.pdf]
